# Supplementary material
Source: publisher figshare collection journal article supplement (https://frontiersin.figshare.com/ndownloader/files/22724762)
Supplement: Supplementary file 1 [file 22724762]

Supplementary table 1. Summary of OFOS deployments and specifications at HAUSGARTEN between 2002 and 2017.

| Year | Research Vessel | Cruise No. | OFOS Frame (cm) | Make of Still Camera | Lighting and Laser points |
| --- | --- | --- | --- | --- | --- |
| 2002 | Polarstern | ARK XVIII/1b | 145x225×145 | Benthos Inc. | 2 high-intensity discharge lights, strobes  3 red LED laser pointers (50 cm distance) |
| 2004 | Polarstern | ARK XX/1 | 145x225×145 | Benthos Inc. | 2 high-intensity discharge lights, strobes  3 red LED laser pointers (50 cm distance) |
| 2007 | Polarstern | ARK XXII/1 | 145x225×145 | Benthos model 372-A | 2 xenon head lamps (OKTOPUS)  2 flash lights (BENTHOS flash, model 383)  2 green laser pointers (Scholz) (52 cm distance) |
| 2011 | Polarstern | ARK XXVI/2 | 120x110×120 | Canon EOS-1Ds Mark III (modified by Isitec, Germany) | Kongsberg strobe (OE11-242)  4 Deep Sea Power & Light LED lights (LED Multi-Sealite)  3 red laser pointers (Oktopus, Germany) |
| 2012 | Polarstern | ARK XXVII/2 | 140x92×135 | Canon EOS-1Ds Mark III (modified by Isitec, Germany) | Kongsberg strobe (OE11-242)  4 Deep Sea Power & Light LED lights (LED Multi-Sealite)  3 red laser pointers (Oktopus, Germany) |
| 2013 | M.S. Merian | MSM29 | 140x92×135 | Canon EOS-1Ds Mark III (modified by Isitec, Germany) | Kongsberg strobe (OE11-242)  4 Deep Sea Power & Light LED lights (LED Multi-Sealite)  3 red laser pointers (Oktopus, Germany) |
| 2014 | Polarstern | ARK XXVIII/1 | 140x92×135 | Canon EOS-1Ds Mark III (modified by Isitec, Germany) | 2 Sea & Sea YS-250PRO (modified by Isitec, Germany)  4 Multi-Sealite LED Lights  3 red laser pointers (Oktopus, Germany) (50 cm distance) |
| 2015 | Polarstern | ARK XXIX/2 | 140x92×135 | Canon EOS 5D Mark III (modified by Isitec, Germany) | 2 Sea & Sea YS-250PRO (modified by Isitec, Germany)  4 Multi-Sealite LED Lights  3 red laser pointers (Oktopus, Germany) (50 cm distance) |
| 2016 | Polarstern | ARK XXX/1 | 140x92×135 | Canon EOS 5D Mark III (modified by Isitec, Germany) | 2 Sea & Sea YS-250PRO (modified by Isitec, Germany)  4 Multi-Sealite LED Lights  3 red laser pointers (Oktopus, Germany) (50 cm distance) |
| 2017 | Polarstern | ARK-XXXI/2 | 140x92×135 | Canon EOS 5D Mark III (modified by Isitec, Germany) | 2 Sea & Sea YS-250PRO (modified by Isitec, Germany)  4 Multi-Sealite LED Lights  3 red laser pointers (Oktopus, Germany) (50 cm distance) |
